# Supplementary material
Source: publisher site journal article supplement (http://www.kjim.org/upload/media/kjim-2020-180-suppl5.pdf)
Supplement: Supplementary file 1 [file kjim-2020-180-suppl5.pdf]

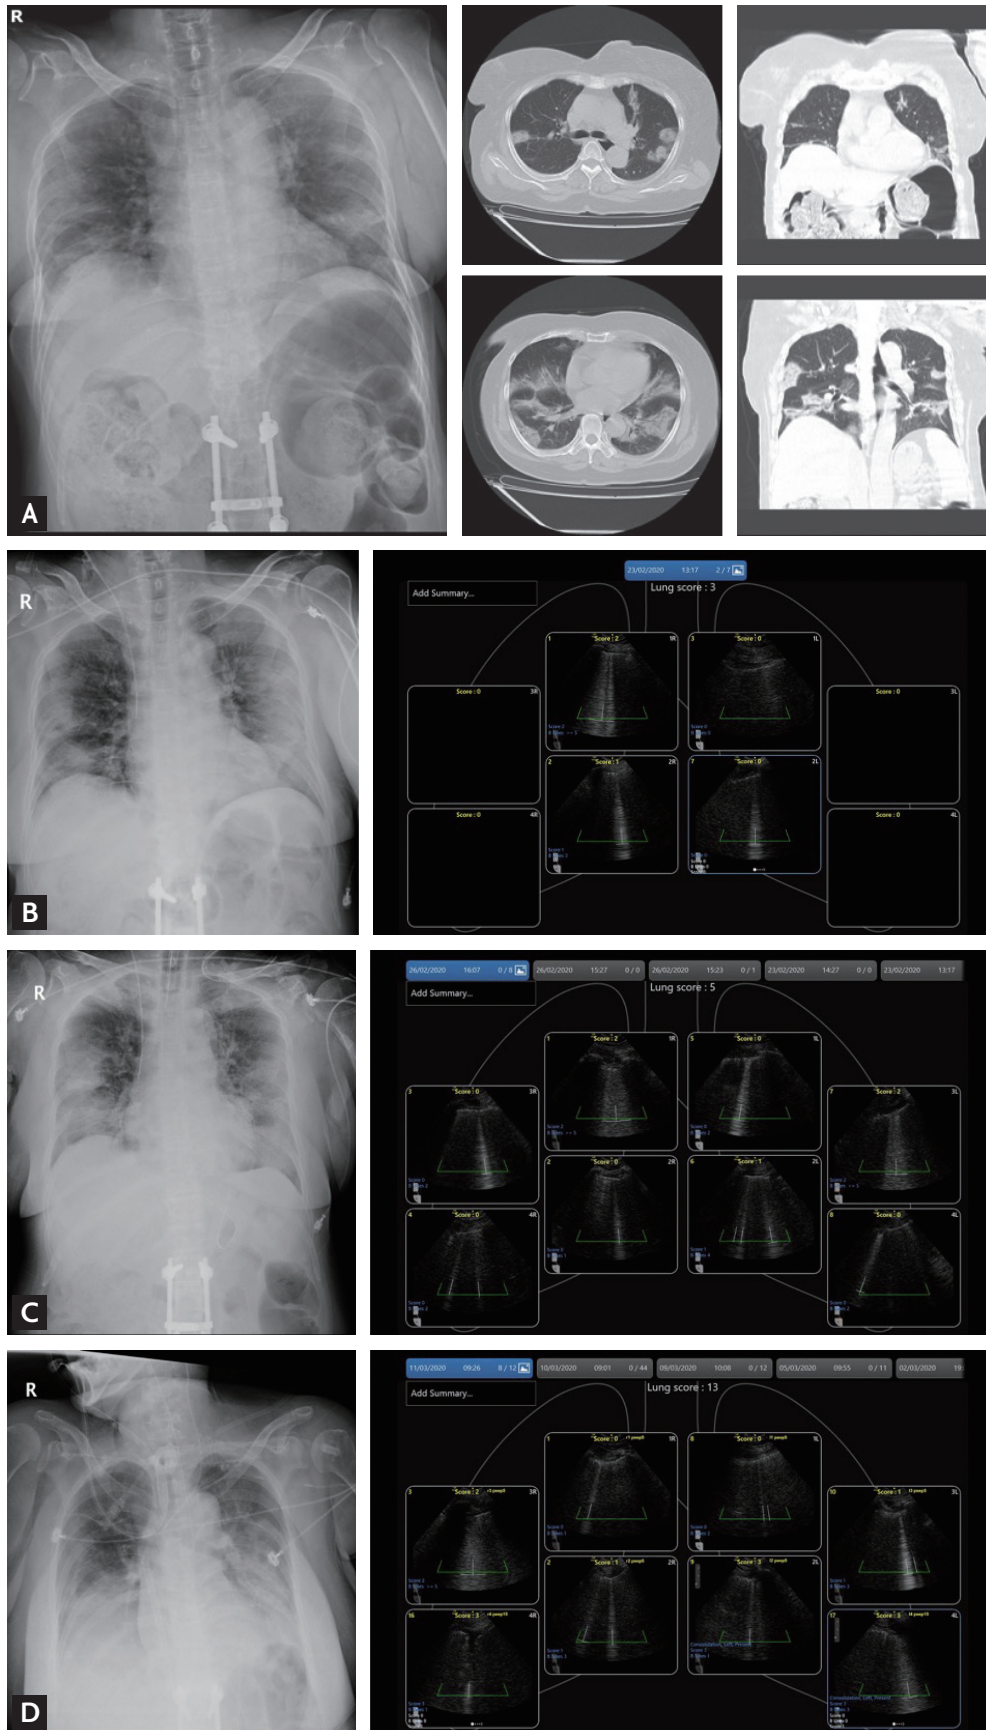

**Supplementary Figure 5.** Case 4: The chest X-rays and computed tomography showing multi-focal ground-glass opacities in the lung fields bilaterally (A), lung ultrasound findings and aeration scores compared with chest X-rays were changed with 3 (in anterior areas only) on admission day (B), 5 (in intubated state) on day 4 (C), and 13 (in extracorporeal membrane assisted state) on day 18 (D).
